# Supplementary material for: Genome-wide mapping of Hif-1α binding sites in zebrafish
Source: PubMed Central journal article supplement (PMC4642629; doi:10.1186/s12864-015-2169-x), 2015-11-11

6A

chr17:19,965,227-20,009,608 44,382 bp

go

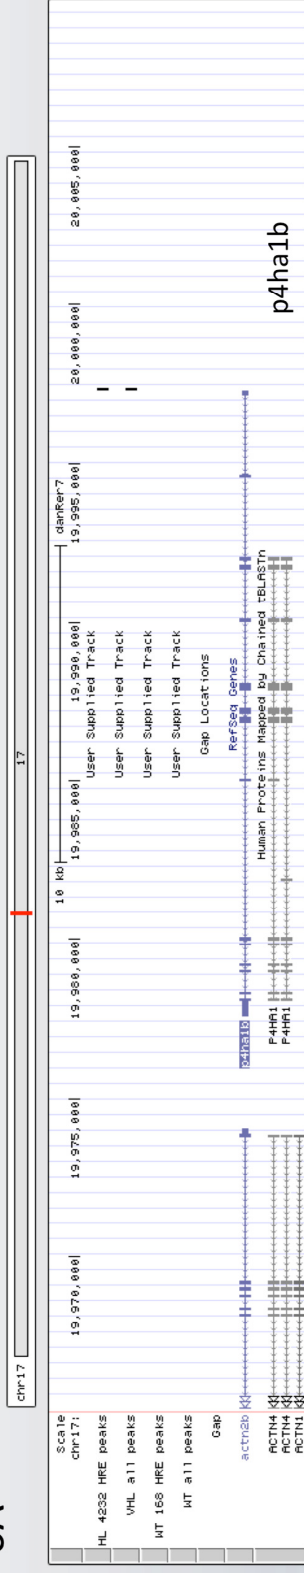

6B

chr17:9,767,732-9,803,851 36,120 bp

go

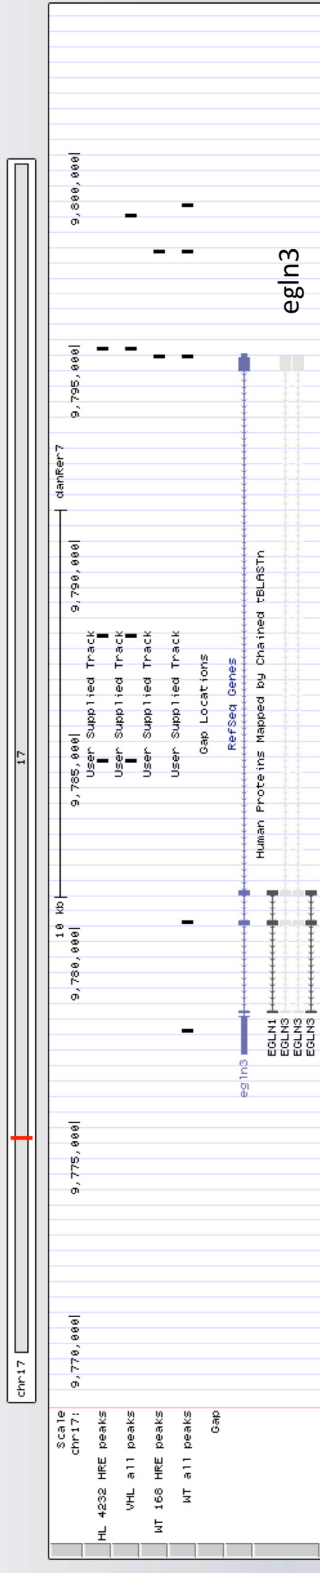

6C

chr18:32,931,053-32,995,210 64,158 bp

go

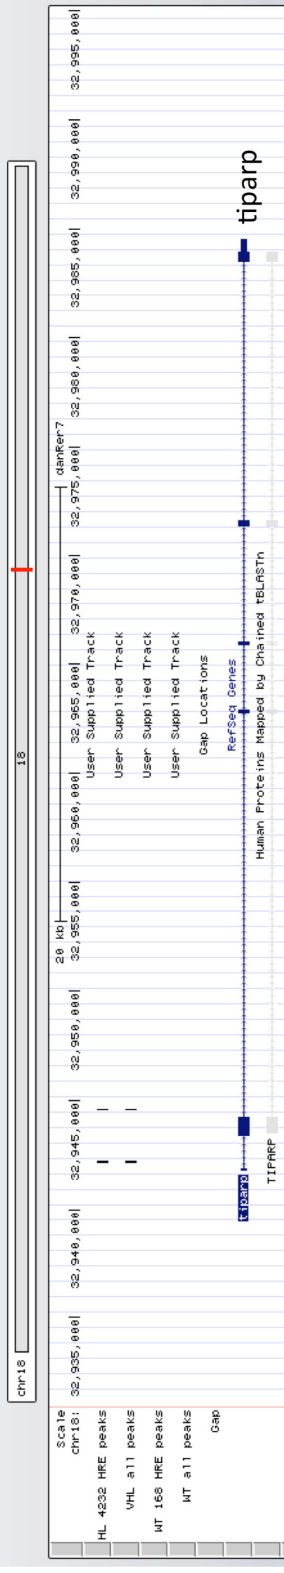

6D

chr15:24,258,502-24,265,467 6,966 bp

go

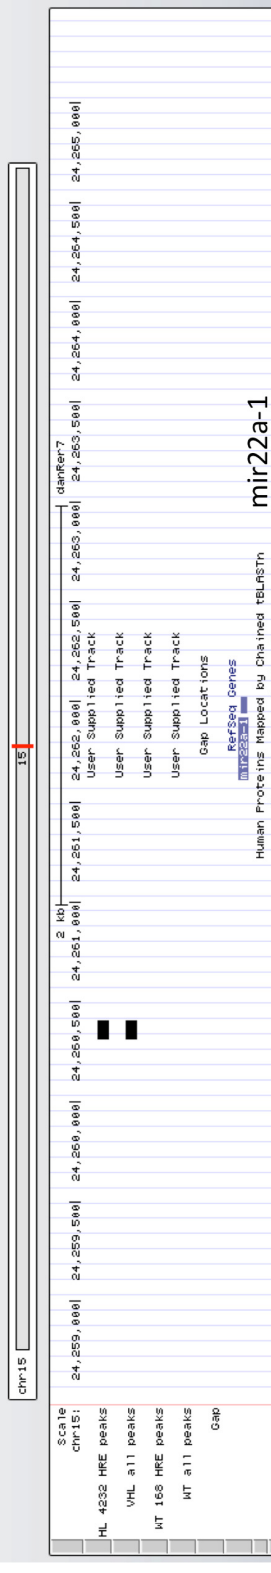

6E

chr4:24,545,466-24,587,234 41,769 bp

go

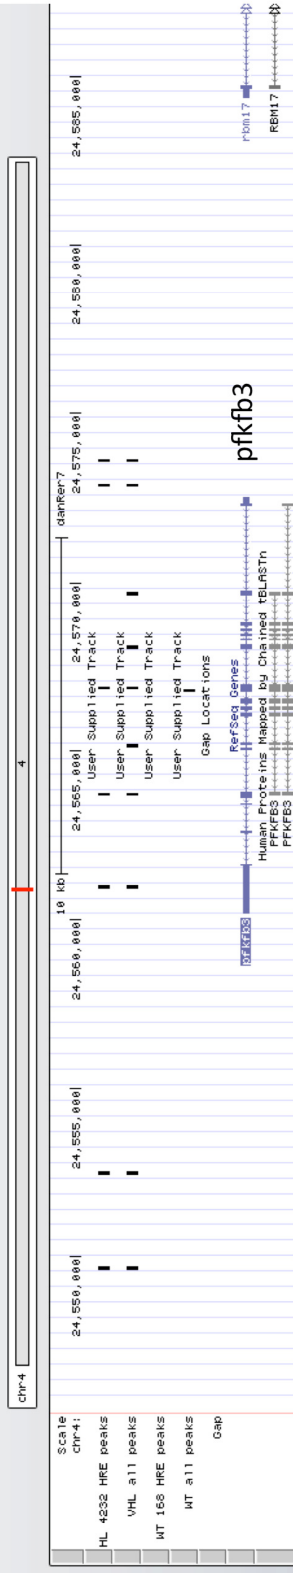

Supplement: 12864_2015_2169_MOESM11_ESM.pdf [file 12864_2015_2169_MOESM11_ESM.pdf]
